# Supplementary material for: The Impact of Endometrioma on Embryo Quality in In Vitro Fertilization: A Retrospective Cohort Study
Source: MDPI journal article supplement (doi:10.3390/jcm12062416), 2023-03-21
Supplement: s1 [file s1]

**Table S1.** Baseline characteristics of the women with endometrioma who received surgery and control group before and after PSM.

| Characteristic                                | Before matching                         |                           |       | After matching                          |                          |       |
|-----------------------------------------------|-----------------------------------------|---------------------------|-------|-----------------------------------------|--------------------------|-------|
|                                               | Endometrioma<br>with surgery<br>(n=538) | Control group<br>(n=3133) | SMD   | Endometrioma<br>with surgery<br>(n=441) | Control group<br>(n=441) | SMD   |
| Age (years)                                   | 31 (28-33)                              | 32 (29-35)                | 0.218 | 31 (29-34)                              | 31 (28-34)               | 0.080 |
| BMI (kg/m <sup>2</sup> )                      | 22.33 (20.37-24.23)                     | 23.30 (21.22-25.88)       | 0.356 | 22.43 (20.59-24.61)                     | 22.37 (20.20-24.46)      | 0.053 |
| Type of infertility                           |                                         |                           |       |                                         |                          |       |
| Primary                                       | 297 (55.2)                              | 940 (30.0)                | 0.507 | 219 (49.7)                              | 215 (48.8)               | 0.018 |
| Secondary                                     | 241 (44.8)                              | 2193 (70.0)               | 0.507 | 222 (50.3)                              | 226 (51.2)               | 0.018 |
| Basal FSH (IU/l)                              | 7.28 (6.06-9.09)                        | 6.55 (5.60-7.81)          | 0.315 | 7.21 (6.05-8.59)                        | 6.88 (5.74-8.33)         | 0.043 |
| Basal LH (IU/l)                               | 4.87 (3.75-6.19)                        | 4.50 (3.36-5.88)          | 0.131 | 4.85 (3.62-5.99)                        | 4.53 (3.43-5.96)         | 0.018 |
| Basal oestradiol (pg/ml)                      | 37.80 (27.22-51.85)                     | 33.80 (25.72-45.00)       | 0.197 | 36.92 (26.65-50.40)                     | 35.6 (26.35-49.93)       | 0.041 |
| AMH                                           | 1.75 (0.85-3.36)                        | 2.50 (1.35-4.26)          | 0.258 | 1.98 (0.98-3.62)                        | 2.01 (0.96-3.54)         | 0.027 |
| AFC                                           | 9 (6-13)                                | 12 (9-17)                 | 0.666 | 10 (7-14)                               | 10 (7-14)                | 0.041 |
| Sperm concentration ( $\times 10^6$ /ml)      | 60.10 (39.45-82.05)                     | 59.00 (39.30-86.10)       | 0.054 | 61.10 (40.45-84.70)                     | 58.00 (38.30-84.10)      | 0.034 |
| Sperm motility (%)                            | 67.60 (56.68-79.43)                     | 67.10 (55.90-78.30)       | 0.041 | 67.40 (56.45-79.55)                     | 67.60 (57.45-78.45)      | 0.012 |
| Sperm normal morphology (%)                   | 5.86 (4.81-7.34)                        | 6 (4.95-7.56)             | 0.133 | 5.88 (4.89-7.34)                        | 5.66 (4.93-7.18)         | 0.057 |
| Ovarian stimulation regimen                   |                                         |                           |       |                                         |                          |       |
| Long GnRH agonist protocol                    | 159 (29.6)                              | 1512 (48.3)               | 0.410 | 155 (35.1)                              | 159 (36.1)               | 0.020 |
| Ultra-long GnRH agonist protocol              | 106 (19.7)                              | 174 (5.6)                 | 0.356 | 63 (14.3)                               | 69 (15.6)                | 0.034 |
| Short GnRH agonist protocol                   | 139 (25.8)                              | 826 (26.4)                | 0.012 | 123 (27.9)                              | 107 (24.3)               | 0.083 |
| GnRH antagonist protocol                      | 68 (12.6)                               | 511 (16.3)                | 0.110 | 67 (15.2)                               | 68 (15.4)                | 0.007 |
| Other                                         | 66 (12.3)                               | 110 (3.5)                 | 0.267 | 33 (7.5)                                | 38 (8.6)                 | 0.035 |
| Days of ovarian stimulation                   | 10 (9-12)                               | 10 (9-11)                 | 0.011 | 10 (9-12)                               | 10 (9-12)                | 0.004 |
| Gonadotrophin starting dose (IU)              | 188 (150-225)                           | 150 (150-225)             | 0.070 | 150 (150-225)                           | 150 (150-225)            | 0.023 |
| Total gonadotrophin dose (IU)                 | 2025 (1500-2850)                        | 1800 (1356-2475)          | 0.148 | 2000 (1500-2750)                        | 1950 (1500-2700)         | 0.000 |
| Endometrial thickness on HCG trigger day (cm) | 1.10 (0.90-1.25)                        | 1.00 (0.90-1.20)          | 0.088 | 1.10 (0.95-1.20)                        | 1.10 (0.90-1.20)         | 0.031 |
| LH level on HCG trigger day (IU)              | 2.81 (1.52-5.33)                        | 2.66 (1.65-4.35)          | 0.184 | 2.67 (1.53-4.87)                        | 2.75 (1.55-4.79)         | 0.014 |
| Oestradiol level on HCG trigger day (pg/ml)   | 2218 (1319-3166)                        | 2825 (1802-4169)          | 0.355 | 2386 (1515-3474)                        | 2345 (1520-3446)         | 0.020 |
| Progesterone level on HCG trigger day (ng/ml) | 0.81 (0.56-1.15)                        | 0.67 (0.46-0.97)          | 0.144 | 0.81 (0.56-1.11)                        | 0.67 (0.46-0.97)         | 0.013 |

Values are presented as median (interquartile range) or n (%). BMI: Body mass index; FSH: Follicle-stimulating hormone; LH: Luteinizing

hormone; AMH: Anti-Müllerian hormone; AFC: Antral follicle count; GnRH: Gonadotropin releasing hormone; HCG: Human chorionic

gonadotropin; PSM: Propensity score matching; SMD: Standardized mean difference.

**Table S2.** Baseline characteristics of the endometrioma women with and without surgery before and after PSM.

| Characteristic                                | Before matching         |                            |       | After matching          |                            |       |
|-----------------------------------------------|-------------------------|----------------------------|-------|-------------------------|----------------------------|-------|
|                                               | Endometrioma            | Endometrioma               | SMD   | Endometrioma            | Endometrioma               | SMD   |
|                                               | with surgery<br>(n=538) | without surgery<br>(n=126) |       | with surgery<br>(n=109) | without surgery<br>(n=109) |       |
| Age (years)                                   | 31 (28-33)              | 31 (29-34)                 | 0.029 | 31 (29-35)              | 31 (29-34)                 | 0.002 |
| BMI (kg/m <sup>2</sup> )                      | 22.33 (20.37-24.23)     | 22.35 (20.28-24.23)        | 0.047 | 22.04 (20.14-24.41)     | 22.09 (20.14-24.24)        | 0.048 |
| Type of infertility                           |                         |                            |       |                         |                            |       |
| Primary                                       | 297 (55.2)              | 70 (55.6)                  | 0.007 | 56 (51.4)               | 61 (56.0)                  | 0.092 |
| Secondary                                     | 241 (44.8)              | 56 (44.4)                  | 0.007 | 53 (48.6)               | 48 (44.0)                  | 0.092 |
| Basal FSH (IU/l)                              | 7.28 (6.06-9.09)        | 6.74 (5.72-8.04)           | 0.257 | 7.15 (5.86-8.95)        | 6.82 (5.85-8.51)           | 0.073 |
| Basal LH (IU/l)                               | 4.87 (3.75-6.19)        | 4.66 (3.61-6.14)           | 0.058 | 5.16 (3.77-6.12)        | 4.74 (3.70-6.37)           | 0.038 |
| Basal oestradiol (pg/ml)                      | 37.80 (27.22-51.85)     | 37.90 (26.3-53.4)          | 0.048 | 36.00 (25.35-47.45)     | 38.00 (26.70-52.85)        | 0.067 |
| AMH                                           | 1.75 (0.85-3.36)        | 2.40 (1.31-4.94)           | 0.309 | 2.43 (1.11-4.79)        | 2.35 (1.26-5.02)           | 0.032 |
| AFC                                           | 9 (6-13)                | 9 (6-13)                   | 0.108 | 9 (6-12)                | 9 (6-14)                   | 0.065 |
| Sperm concentration (×10 <sup>6</sup> /ml)    | 60.10 (39.45-82.05)     | 62.20 (42.70-91.75)        | 0.123 | 63.50 (39.95-84.05)     | 61.60 (42.40-89.10)        | 0.048 |
| Sperm motility (%)                            | 67.60 (56.68-79.43)     | 64.55 (54.38-78.78)        | 0.067 | 65.10 (53.75-79.25)     | 65.70 (55.45-78.85)        | 0.089 |
| Sperm normal morphology (%)                   | 5.86 (4.81-7.34)        | 6.09 (4.93-7.76)           | 0.070 | 5.91 (4.90-6.90)        | 5.99 (4.95-7.63)           | 0.100 |
| Ovarian stimulation regimen                   |                         |                            |       |                         |                            |       |
| Long GnRH agonist protocol                    | 159 (29.6)              | 33 (26.2)                  | 0.074 | 25 (22.9)               | 29 (26.6)                  | 0.080 |
| Ultra-long GnRH agonist protocol              | 106 (19.7)              | 48 (38.1)                  | 0.462 | 40 (36.7)               | 37 (33.9)                  | 0.069 |
| Short GnRH agonist protocol                   | 139 (25.8)              | 30 (23.8)                  | 0.046 | 29 (26.6)               | 28 (25.7)                  | 0.021 |
| GnRH antagonist protocol                      | 68 (12.6)               | 11 (8.7)                   | 0.118 | 10 (9.2)                | 11 (10.1)                  | 0.028 |
| Other                                         | 66 (12.3)               | 4 (3.2)                    | 0.277 | 5 (4.6)                 | 4 (3.7)                    | 0.028 |
| Days of ovarian stimulation                   | 10 (9-12)               | 11 (9-13)                  | 0.298 | 10 (9-12)               | 11 (9-12.5)                | 0.097 |
| Gonadotrophin starting dose (IU)              | 188 (150-225)           | 200 (150-225)              | 0.094 | 200 (150-225)           | 200 (150-225)              | 0.044 |
| Total gonadotrophin dose (IU)                 | 2025 (1500-2850)        | 2306 (1650-3234)           | 0.232 | 2150 (1450-3038)        | 2175 (1650-2962)           | 0.059 |
| Endometrial thickness on HCG trigger day (cm) | 1.10 (0.90-1.25)        | 1.20 (1.00-1.25)           | 0.297 | 1.10 (1.00-1.25)        | 1.10 (1.00-1.25)           | 0.062 |
| LH level on HCG trigger day (IU)              | 2.81 (1.52-5.33)        | 2.37 (1.23-4.10)           | 0.198 | 2.06 (1.24-4.81)        | 2.51 (1.30-4.23)           | 0.072 |
| Oestradiol level on HCG trigger day (pg/ml)   | 2218 (1319-3166)        | 2739 (1903-4304)           | 0.398 | 2561 (1623-3811)        | 2644 (1868-3957)           | 0.043 |
| Progesterone level on HCG trigger day (ng/ml) | 0.81 (0.56-1.15)        | 0.81 (0.50-1.11)           | 0.108 | 0.82 (0.57-1.17)        | 0.81 (0.48-1.18)           | 0.006 |

Values are presented as median (interquartile range) or n (%). BMI: Body mass index; FSH: Follicle-stimulating hormone; LH: Luteinizing

hormone; AMH: Anti-Müllerian hormone; AFC: Antral follicle count; GnRH: Gonadotropin releasing hormone; HCG: Human chorionic

gonadotropin; PSM: Propensity score matching; SMD: Standardized mean difference.
